# Supplementary material
Source: ML conference proceedings conference paper supplement (https://aclanthology.org/D19-1332)
Supplement: Attachment [file D19-1332.Attachment.zip › mctaco_appendix.pdf]

## A Supplemental Material

### A.1 Perturbing Candidate Answers

Here we provide a few missing details from *Step 3* of our annotations (Section 3). In particular, we create collections of common temporal expressions (see Table 3) to detect whether the given candidate answer contains a temporal expression or not. If a match is found within this list, we use the mappings to create perturbations of the temporal expression.

| Adjectives                                                                                                                                                                                                                                                       | Frequency                                                                                                                                                                                | Period                 | Typical time                                                                                                                                                                                                                        | Units                                                                                                                                                                                                                                                                                                                                                                                                                                                                    |
|------------------------------------------------------------------------------------------------------------------------------------------------------------------------------------------------------------------------------------------------------------------|------------------------------------------------------------------------------------------------------------------------------------------------------------------------------------------|------------------------|-------------------------------------------------------------------------------------------------------------------------------------------------------------------------------------------------------------------------------------|--------------------------------------------------------------------------------------------------------------------------------------------------------------------------------------------------------------------------------------------------------------------------------------------------------------------------------------------------------------------------------------------------------------------------------------------------------------------------|
| early:late<br>late:early<br>morning:late night<br>night:early morning<br>evening:morning<br>everlasting:periodic<br>initial:last<br>first:last<br>last:first<br>overdue:on time<br>belated:punctual<br>long-term:short-term<br>delayed:early<br>punctual:belated | always:sometimes:never<br>occasionally:always:never<br>often:rarely<br>usually:rarely<br>rarely:always<br>constantly:sometimes<br>never:sometimes:always<br>regularly:occasionally:never | night:day<br>day:night | now:later<br>today:yesterday<br>tomorrow:yesterday<br>tonight:last night<br>yesterday:tomorrow<br>am:pm<br>pm:am<br>a.m.:p.m.<br>p.m.:a.m.<br>afternoon:morning<br>morning:evening<br>night:morning<br>after:before<br>before:after | second:hour:week:year<br>seconds:hours:weeks:years<br>minute:day:month:century<br>minutes:days:months:centuries<br>hour:second:week:year<br>hours:seconds:weeks:years<br>day:minute:month:century<br>days:minutes:months:centuries<br>week:second:hour:year<br>weeks:seconds:hours:years<br>month:minute:day:century<br>months:minutes:days:centuries<br>year:second:hour:week<br>years:seconds:hours:weeks<br>century:minute:day:month<br>centuries:minutes:days:months |

Table 3: Collections of temporal expressions used in creating perturbation of the candidate answers. Each mention is grouped with its variations (e.g., “first” and “last” are in the same set).

### A.2 Performance as a function of training size

An intuition that we stated is that, the task at hand requires a successful model to bring in external world knowledge beyond what is observed in the dataset; since for a task like this, it is unlikely to compile an dataset which covers all the possible events and their attributes. In other words, the “traditional” supervised learning alone (with no pre-training or external training) is unlikely to succeed. A corollary to this observation is that, tuning a pre-training system (such as BERT (Devlin et al., 2019)) likely requires very little supervision.

We plot the performance change, as a function of number of instances observed in the training time (Figure 3). Each point in the figure share the same parameters and averages of 5 distinct trials over different random sub-samples of the dataset. As it can be observed, the performance plateaus after about 2.5k question-answer pairs (about 20% of the whole datasets). This verifies the intuition that systems can rely on a relatively small amount of supervision to tune to task, if it models the world knowledge through pre-training. Moreover, it shows that trying to make improvement through getting more labeled data is costly and impractical.

### A.3 Annotation Interfaces

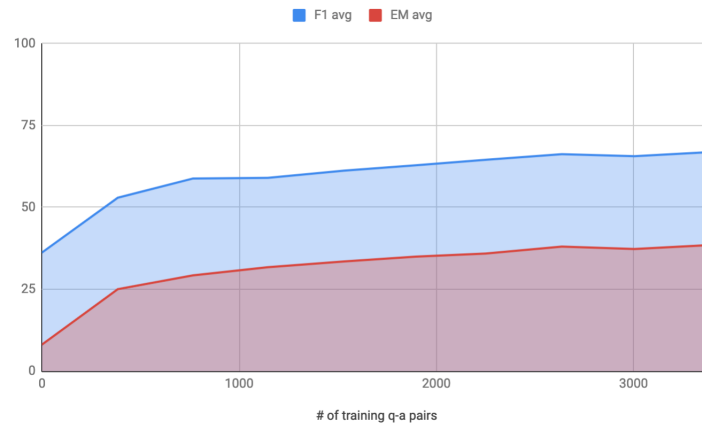

Figure 3: Performance of supervised algorithm (BERT; Section 4) as function of various sizes of observed training data. When no training data provided to the systems (left-most side of the figure), the performance measures amount to random guessing.

**Sentence:**

Ask a question regarding **Event Duration**

Question 1:

Answer 1:

Ask a question regarding **Transient v. Stationary**

Question 2:

Answer 2:

Ask a question regarding **Event Ordering**

Question 3:

Answer 3:

Ask a question regarding **Absolute Timepoint**

Question 4:

Answer 4:

Ask a question regarding **Frequency**

Question 5:

Answer 5:

Figure 4: Step 1
